# Supplementary material for: Predictive modelling of colossal ATR-FTIR spectral data using PLS-DA: empirical differences between PLS1-DA and PLS2-DA algorithms
Source: Royal Society of Chemistry journal article supplement (doi:10.1039/c8an02074d), 2019-01-01
Supplement: c8an02074d1.pdf [file c8an02074d1.pdf]

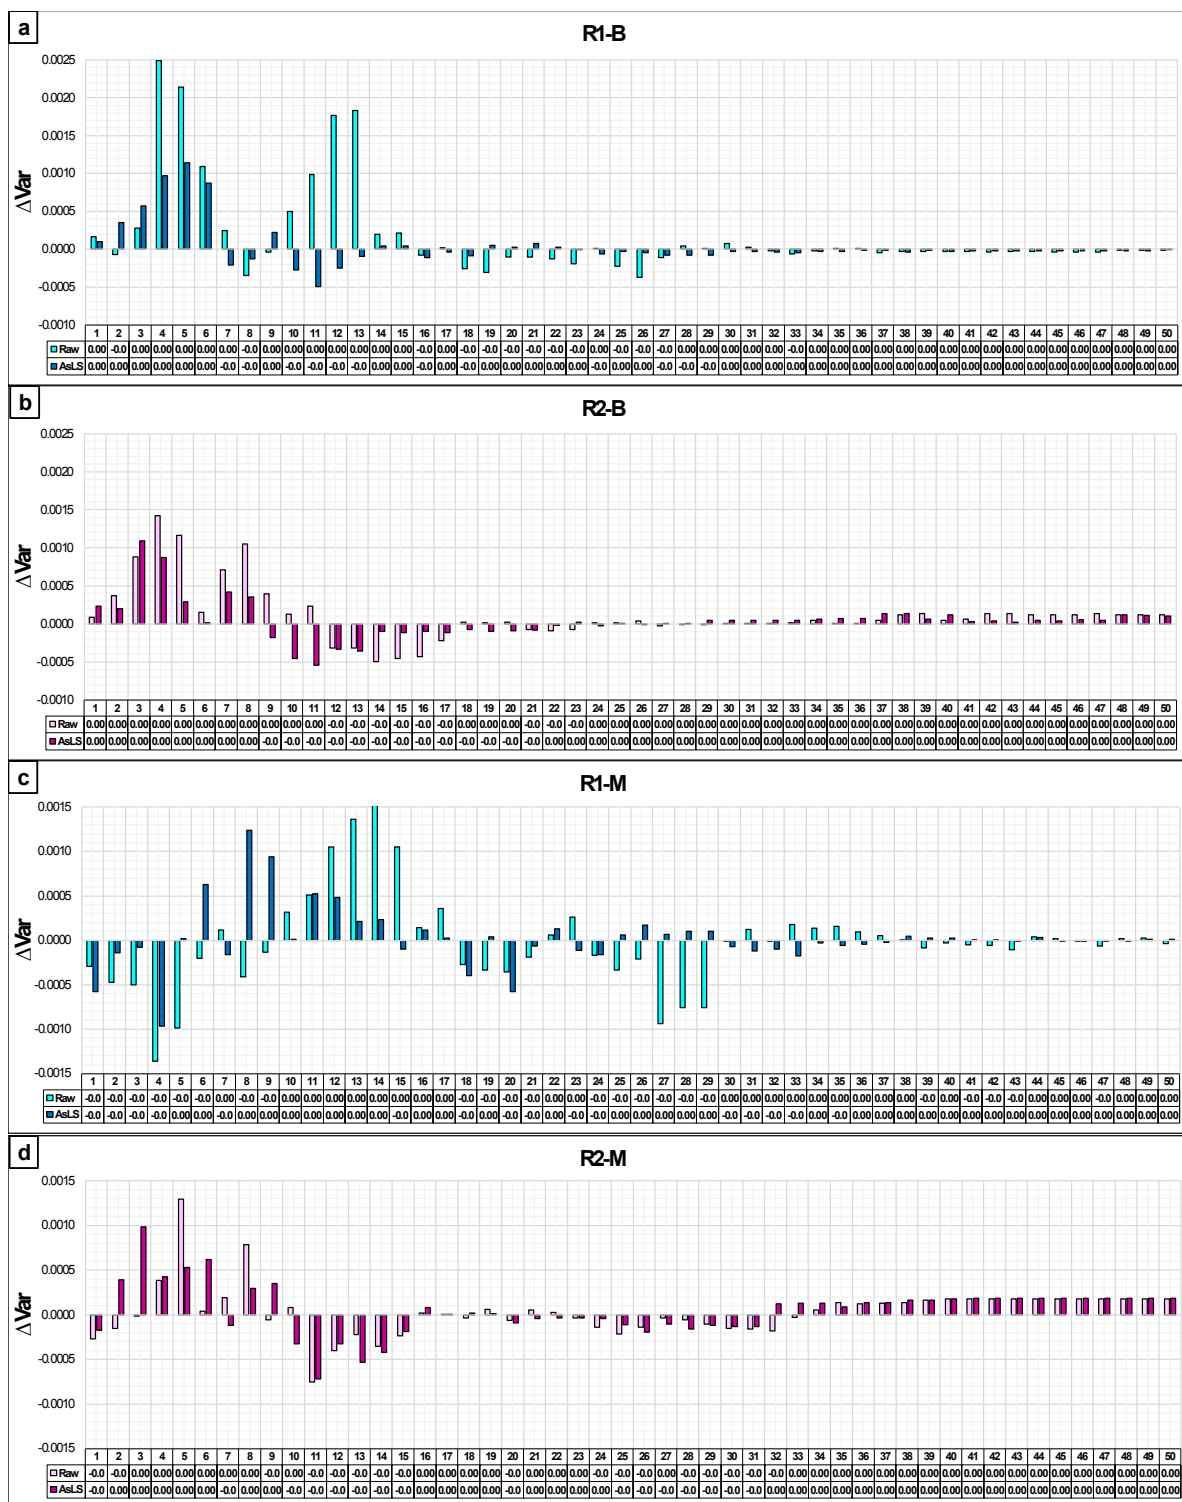

**Supplementary Fig. 1** Variance differences of PLS1-DA models against the respective PLS2-DA models that constructed using the raw and AsLS datasets and plotted by the first 50 PLS components. The variances were estimated *via* 10-fold CV.
